# Supplementary material for: Remotely detected aboveground plant function predicts belowground processes in two prairie diversity experiments
Source: PubMed Central journal article supplement — Ecol Monogr. 2021 Nov 23;92(1):e01488. doi: 10.1002/ecm.1488 (PMC9285928; doi:10.1002/ecm.1488), 2021-11-23
Supplement: ECM-92-0-s003.pdf [file ECM-92-0-s003.pdf]

**Supporting Information.** Cavender-Bares, J.M., A.K. Schweiger, J.A. Gamon, H. Gholizadeh, K. Helzer, C. Lapadat, M.D. Madritch, P.A. Townsend, Z. Wang, and S.E. Hobbie. 2021. Remotely detected aboveground plant function predicts belowground processes in two prairie diversity experiments. *Ecological Monographs*.

## Appendix S2

**Table S1.** List of data collected in the BioDIV experiment at the Cedar Creek Ecosystem Science Reserve in Minnesota and in the Wood River Nature Conservancy prairie diversity experiment in Nebraska, including year collected, and whether the data component has been previously been published.

| Year | Experiment | Factor measured on the ground           | Remotely sensed data collected | Number of plots (or subplots) | Previously published |
|------|------------|-----------------------------------------|--------------------------------|-------------------------------|----------------------|
| 2014 | BioDIV     |                                         | AVIRIS NG                      | All plots                     | Wang et al 2019      |
| 2014 | BioDIV     |                                         | Plant trait map                | All plots                     | Wang et al 2019      |
| 2014 | BioDIV     |                                         | Plant FD                       | All plots                     | Current study        |
| 2014 | BioDIV     | Plant aboveground biomass               |                                | 154 plots                     | Cline et al 2018     |
| 2014 | BioDIV     | Plant richness and species biomass      |                                | 154 plots                     | Cline et al 2018     |
| 2014 | BioDIV     | Functional group biomass and proportion |                                | 154 plots                     | Cline et al 2018     |
| 2014 | BioDIV     | Functional diversity - leaf level       |                                |                               | Schweiger et al 2018 |
| 2014 | BioDIV     | Soil extracellular enzyme activity      |                                | 35 plots                      | Cline et al 2018     |
| 2014 | BioDIV     | Microbial biomass                       |                                | 35 plots                      | Cline et al 2018     |
| 2014 | BioDIV     | Soil N and C                            |                                | 154 plots                     | Cline et al 2018     |
| 2015 | BioDIV     | Leaf level spectral data                |                                |                               | Schweiger et al 2018 |
| 2015 | BioDIV     | Functional diversity - leaf level       |                                |                               | Schweiger et al 2018 |
| 2015 | BioDIV     | Bacterial composition                   |                                | 35 plots                      | Current study        |
| 2015 | BioDIV     | Bacterial diversity                     |                                | 35 plots                      | Current study        |
| 2015 | BioDIV     | Fungal composition                      |                                | 35 plots                      | Cline et al 2018     |
| 2015 | BioDIV     | Fungal diversity                        |                                | 35 plots                      | Cline et al 2018     |
| 2015 | BioDIV     |                                         | AVRIS NG                       | all plots                     | Wang et al 2019      |

|      |            |                                                  |                         |              |                       |
|------|------------|--------------------------------------------------|-------------------------|--------------|-----------------------|
| 2015 | BioDIV     | Root chemistry                                   |                         | 35 plots     | Current study         |
| 2015 | BioDIV     | Soil respiration                                 |                         | 35 plots     | Cline et al 2018      |
| 2015 | BioDIV     | Net mineralization rate                          |                         | 35 plots     | Cline et al 2018      |
| 2016 | BioDIV     |                                                  | AVIRIS NG               | all plots    | Wang et al 2019       |
| 2016 | BioDIV     | Soil N and C                                     |                         | 154 plots    | Current study         |
| 2017 | Wood River |                                                  | CALMIT-<br>AISA Kestrel | all plots    | Gholizadeh et al 2019 |
| 2017 | Wood River |                                                  | Plant trait<br>maps     |              | Current study         |
| 2017 | Wood River | Plant richness in plots                          |                         | 36 plots     | Gholizadeh et al 2019 |
| 2017 | Wood River | Plant species percent cover<br>subplots          |                         | 144 subplots | Current study         |
| 2017 | Wood River | Plant aboveground biomass                        |                         | 144 subplots | Current study         |
| 2017 | Wood River | Leaf level spectral data                         |                         | 144 subplots | Current study         |
| 2017 | Wood River | Leaf level functional diversity                  |                         | 144 subplots | Current study         |
| 2017 | Wood River | Soil extracellular enzyme<br>activity            |                         | 144 subplots | Current study         |
| 2017 | Wood River | Microbial biomass                                |                         | 144 subplots | Current study         |
| 2017 | Wood River | Net nitrogen mineralization rate                 |                         | 144 subplots | Current study         |
| 2017 | Wood River | Soil NO <sub>3</sub> , NH <sub>4</sub> , N and C |                         | 144 subplots | Current study         |

## Literature Cited

- Cline, L. C., S. E. Hobbie, M. D. Madritch, C. R. Buyarski, D. Tilman, and J. M. Cavender-Bares. 2018. Resource availability underlies the plant-fungal diversity relationship in a grassland ecosystem. *Ecology* **99**:204-216.
- Gholizadeh, H., J. A. Gamon, P. A. Townsend, A. I. Zyguelbaum, C. J. Helzer, G. Y. Hmimina, R. Yu, R. M. Moore, A. K. Schweiger, and J. Cavender-Bares. 2019. Detecting prairie biodiversity with airborne remote sensing. *Remote Sensing of Environment* **221**:38-49.
- Schweiger, A. K., J. Cavender-Bares, P. A. Townsend, S. E. Hobbie, M. D. Madritch, R. Wang, D. Tilman, and J. A. Gamon. 2018. Plant spectral diversity integrates functional and phylogenetic components of biodiversity and predicts ecosystem function. *Nature Ecology & Evolution* **2**:976-982.
- Wang, Z., P. A. Townsend, A. K. Schweiger, J. J. Couture, A. Singh, S. E. Hobbie, and J. Cavender-Bares. 2019. Mapping foliar functional traits and their uncertainties across three years in a grassland experiment. *Remote Sensing of Environment* **221**:405-416.
